# Supplementary material for: Risk of acute deterioration and care complexity individual factors associated with health outcomes in hospitalised patients with COVID-19: a multicentre cohort study
Source: PubMed Central journal article supplement — BMJ Open. 2021 Feb 17;11(2):e041726. doi: 10.1136/bmjopen-2020-041726 (PMC7893207; doi:10.1136/bmjopen-2020-041726), 2021-02-17
Supplement: bmjopen-2020-041726supp001.pdf [file bmjopen-2020-041726supp001.pdf]

**Supplementary file 1.** Juvé-Udina ME. VIDA score for acute deterioration in the current *human* algorithm.

| <b>H1, H2, H3</b>  |                   |                                                     |
|--------------------|-------------------|-----------------------------------------------------|
| <b>Punctuation</b> | <b>Risk score</b> | <b>Definition</b>                                   |
| 0 – 1              | 0                 | No risk of complication (at that particular moment) |
| 2 – 3              | 1                 | Low risk                                            |
| 4                  | 2                 | Moderate risk (very probable complication)          |
| 5 – 6              | 3                 | High risk (imminent complication if not stabilized) |
| >= 7               | 4                 | Critical complication status                        |
| <b>H4</b>          |                   |                                                     |
| <b>Punctuation</b> | <b>Risk score</b> | <b>Definition</b>                                   |
| 0 – 1              | 0                 | No risk of complication (at that particular moment) |
| 2 – 3              | 1                 | Low risk                                            |
| 4 – 6              | 2                 | Moderate risk (very probable complication)          |
| 7 – 9              | 3                 | High risk (imminent complication if not stabilized) |
| >= 10              | 4                 | Critical complication status                        |
| <b>H5</b>          |                   |                                                     |
| <b>Punctuation</b> | <b>Risk score</b> | <b>Definition</b>                                   |
| 0 – 2              | 0                 | No risk of complication (at that particular moment) |
| 3 – 4              | 1                 | Low risk                                            |
| 5 – 6              | 2                 | Moderate risk (very probable complication)          |
| 7 – 8              | 3                 | High risk (imminent complication if not stabilized) |
| >= 9               | 4                 | Critical complication status                        |
| <b>H6</b>          |                   |                                                     |
| <b>Punctuation</b> | <b>Risk score</b> | <b>Definition</b>                                   |
| 0 – 2              | 0                 | No risk of complication (at that particular moment) |
| 3 – 4              | 1                 | Low risk                                            |
| 5 – 6              | 2                 | Moderate risk (very probable complication)          |
| 7 – 9              | 3                 | High risk (imminent complication if not stabilized) |
| >= 10              | 4                 | Critical complication status                        |
| <b>H7</b>          |                   |                                                     |
| <b>Punctuation</b> | <b>Risk score</b> | <b>Definition</b>                                   |
| <= 3               | 1                 | Low risk                                            |
| 4 – 6              | 2                 | Moderate risk (very probable complication)          |
| 7 – 8              | 3                 | High risk (imminent complication if not stabilized) |
| >= 9               | 4                 | Critical complication status                        |

Abbreviations: H, hospital.
