# Supplementary material for: Risk of acute deterioration and care complexity individual factors associated with health outcomes in hospitalised patients with COVID-19: a multicentre cohort study
Source: PubMed Central journal article supplement — BMJ Open. 2021 Feb 17;11(2):e041726. doi: 10.1136/bmjopen-2020-041726 (PMC7893207; doi:10.1136/bmjopen-2020-041726), 2021-02-17
Supplement: bmjopen-2020-041726supp002.pdf [file bmjopen-2020-041726supp002.pdf]

**Supplementary file 2.** Care complexity individual factors.

| Domains                       | Factors                                                                                      | Specifications                                                                                                                                       |
|-------------------------------|----------------------------------------------------------------------------------------------|------------------------------------------------------------------------------------------------------------------------------------------------------|
| Comorbidity/<br>Complications | Transmissible infection                                                                      | Isolation measures                                                                                                                                   |
|                               | Hemodynamic instability                                                                      | Intensive control of vital signs or state of shock                                                                                                   |
|                               | Chronic disease                                                                              | Conditions (organ failure, degenerative process or oncological disease) that require ongoing medical attention and limit activities of daily living. |
|                               | Uncontrolled pain                                                                            | Verbal numerical rating scale above three points                                                                                                     |
|                               | Extreme weight                                                                               | Low weight, obesity                                                                                                                                  |
|                               | Position impairment                                                                          | Includes any position impairment                                                                                                                     |
|                               | Urinary or faecal incontinence                                                               | Loss of bladder control or failure to control bowel movements                                                                                        |
|                               | Immunosuppression                                                                            | Neutropenia, immunodeficiency or immunosuppressive therapy                                                                                           |
|                               | Anatomical and functional disorders                                                          | Amputation, deformities, joint stiffness                                                                                                             |
|                               | Communication disorders                                                                      | Aphasia, dysphasia, dysarthria, laryngectomy, tracheostomy                                                                                           |
|                               | High risk of haemorrhage                                                                     | Coagulation disorders, thrombocytopenia, anticoagulant therapy                                                                                       |
|                               | Vascular fragility                                                                           | Capillary fragility, tortuous veins                                                                                                                  |
|                               | Involuntary movements                                                                        | Continuous involuntary movements                                                                                                                     |
| Dehydration                   | Skin turgor                                                                                  |                                                                                                                                                      |
| Oedema                        | An accumulation of an excessive amount of watery fluid in cells, tissues, or serous cavities |                                                                                                                                                      |
| Developmental                 | Old age                                                                                      | ≥75 years                                                                                                                                            |
| Psycho-<br>emotional          | Fear/anxiety                                                                                 | Fear or anxiety (moderate or intense)                                                                                                                |
|                               | Impaired adaptation                                                                          | Disruptive behaviour, hopelessness or surrender                                                                                                      |
|                               | Aggressive behaviour                                                                         | Physical or verbal aggressive behaviour (moderate or intense)                                                                                        |
| Mental-<br>cognitive          | Mental status impairments                                                                    | Confusion, disorientation, stupor, transient loss of consciousness                                                                                   |
|                               | Agitation                                                                                    | Psychomotor agitation                                                                                                                                |
|                               | Impaired cognitive functions                                                                 | Intellectual disability, amnesia                                                                                                                     |
|                               | Perception of reality disorders                                                              | Delirium, hallucinations, disconnection from reality                                                                                                 |
| Sociocultural                 | Lack of caregiver support                                                                    | Without caregiver support or caregiver burnout                                                                                                       |
|                               | Belief conflict                                                                              | Spiritual distress                                                                                                                                   |
|                               | Language barriers                                                                            | Barrier to communication resulting from speaking different languages than Spanish or Catalan without translator.                                     |
|                               | Social exclusion                                                                             | Extreme poverty                                                                                                                                      |
